# Supplementary material for: Analytical Performance of NGS-Based Molecular Genetic Tests Used in the Diagnostic Workflow of Pheochromocytoma/Paraganglioma
Source: MDPI journal article supplement (doi:10.3390/cancers13164219), 2021-08-22
Supplement: s1 [file s1]

**Supplementary Table S1:** Sequencing platforms of WES.

|                              | <b>Illumina HiSeq 2000</b>         |                                                  | <b>Complete Genomics</b>           |
|------------------------------|------------------------------------|--------------------------------------------------|------------------------------------|
| <b>Library preparation</b>   | <b>SureSelect Agilent 51M</b>      | <b>Illumina Nextera Rapid Capture Exome v1.2</b> | <b>BGI 59Mb exome kit</b>          |
| <b>Sequencing instrument</b> | HiSeq 2000                         | HiSeq 2000                                       | Complete Genomics                  |
| <b>Primary analysis</b>      | Illumina base calling Software 1.7 | Illumina base calling software 1.7               | Complete genomics RTA 1.7 software |
| <b>Alignment</b>             | Burrows-Wheeler Aligner (BWA)      | Burrows-Wheeler Aligner (BWA)                    | Teramap                            |
| <b>Annotation</b>            | GATK workflow (Samtools, Annovar)  | GATK workflow (Samtools, Annovar)                | GATK workflow (Samtools, Annovar)  |

**Supplementary Table S2:** Distribution of sequencing reads obtained by different WES platforms

| <i>Mean values</i>                            | <b>SureSelect Agilent 51M</b> | <b>BGI 59Mb exome kit</b> | <b>Illumina Nextera Rapid Capture Exome v1.2</b> |
|-----------------------------------------------|-------------------------------|---------------------------|--------------------------------------------------|
| reads aligned to the human genome (%)         | 98,68                         | 100                       | 99,88                                            |
| unique reads (%)                              | 61,6                          | 56,7                      | 53,5                                             |
| bases corresponding to targeted sequences (%) | 51,6                          | 58,9                      | 50,38                                            |
| target bases with no coverage (%)             | 1,32                          | 0                         | 0,13                                             |

**Supplementary Table S3:** Mean depth of coverage of PPGL genes obtained during WES.

| Gene            | SureSelect Agilent<br>51M, read numbers<br>(range) | BGI 59Mb exome kit<br>read numbers (range) | Illumina Nextera Rapid Capture<br>Exome v1.2 read numbers (range)) |
|-----------------|----------------------------------------------------|--------------------------------------------|--------------------------------------------------------------------|
| <i>EGLN1</i>    | 112,7 (94,4–140,5)                                 | 58,5 (49,1–65,4)                           | 121,4 (97,3–146,7)                                                 |
| <i>EPAS1</i>    | 110,5 (101–123,5)                                  | 77,4 (48,7–89,7)                           | 149,0 (115,7–192,6)                                                |
| <i>FH</i>       | 82,6 (73,2–103,2)                                  | 58,0 (50,2–68,8)                           | 132,4 (106,2–155,1)                                                |
| <i>GOT2</i>     | 77,0 (71,6–85,5)                                   | 95,0 (77,4–105,6)                          | 50,6 (40,6–61,3)                                                   |
| <i>KIF1B</i>    | 141,8 (132,4–155,3)                                | 103,5 (84–116,6)                           | 148,9 (120–184,2)                                                  |
| <i>MAX</i>      | 105,3 (92–126,7)                                   | 80,8 (66,5–87,4)                           | 147,8 (120–184,2)                                                  |
| <i>MDH2</i>     | 105,2 (96,5–117,7)                                 | 90,7 (98,7–103,8)                          | 58,8 (46,2–71,7)                                                   |
| <i>MEN1</i>     | 122,5 (112–143,5)                                  | 95,7 (68,9–109,2)                          | 110,4 (94,2–143,7)                                                 |
| <i>NF1</i>      | 84,5 (78–100)                                      | 109,4 (95,2–124,1)                         | 129,6 (100–158,2)                                                  |
| <i>RET</i>      | 97,2 (87,6–107,8)                                  | 68,7 (48,2–75,7)                           | 132,3 (106,5–173,6)                                                |
| <i>SDHA</i>     | 11,7 (10,5–14,4)                                   | 66,3 (59,6–71,8)                           | 175,9 (147,8–217,5)                                                |
| <i>SDHAF2</i>   | 118,8 (112,5–128,3)                                | 90,2 (81,1–108,4)                          | 166,9 (145–205,7)                                                  |
| <i>SDHB</i>     | 98,8 (85,3–112,8)                                  | 52,9 (41,2–62,6)                           | 158,1 (117,7–199,2)                                                |
| <i>SDHC</i>     | 34,4 (28,1–42,9)                                   | 114,8 (90,8–127,3)                         | 186,9 (140,3–227)                                                  |
| <i>SDHD</i>     | 19,4 (14,7–23,6)                                   | 118,2 (102,3–130,4)                        | 138,3 (101,5–172,3)                                                |
| <i>SLC25A11</i> | 141,4 (126,2–165,3)                                | 147,6 (101,5–169,2)                        | 62,8 (51,8–81,8)                                                   |
| <i>TMEM127</i>  | 84,8 (70,9–90,7)                                   | 47,0 (31,3–53,1)                           | 112,8 (86,8–144)                                                   |
| <i>VHL</i>      | 126,3 (116,9–143,9)                                | 59,5 (49–67,9)                             | 126,2 (105–164,2)                                                  |
